# Supplementary material
Source: ML conference proceedings conference paper supplement (https://proceedings.neurips.cc/paper_files/paper/2014/hash/eb160de1de89d9058fcb0b968dbbbd68-Abstract.html)
Supplement: Supplementary file [file eb160de1de89d9058fcb0b968dbbbd68-Supplemental.zip]

## A Proofs of $\tilde{A}_e, \hat{A}_e, \tilde{B}_e, \hat{B}_e$ as bounds on $A^{\iota(e)-1}$ and $B^{\iota(e)-1}$

**Lemma 4.1.** *In CF-2g, for any  $e \in V$ ,  $\hat{A}_e \subseteq A^{\iota(e)-1}$ , and  $\hat{B}_e \supseteq B^{\iota(e)-1}$ .*

*Proof.* For any element  $e$ , we write  $T_e$  to denote the time at which Alg. 4 line 8 is executed. Consider any element  $e' \in V$ . If  $e' \in \hat{A}_e$ , it must be the case that the algorithm set  $\hat{A}(e')$  to 1 (line 10) before  $T_e$ , which implies  $\iota(e') < \iota(e)$ , and hence  $e' \in A^{\iota(e)-1}$ . So  $\hat{A}_e \subseteq A^{\iota(e)-1}$ .

Similarly, if  $e' \notin \hat{B}_e$ , then the algorithm set  $\hat{B}(e')$  to 0 (line 11) before  $T_e$ , so  $\iota(e') < \iota(e)$ . Also,  $e' \notin A$  because the execution of line 11 excludes the execution of line 10. Therefore,  $e' \notin A^{\iota(e)-1}$ , and  $e' \notin B^{\iota(e)-1}$ . So  $\hat{B}_e \supseteq B^{\iota(e)-1}$ .  $\square$

**Lemma 5.1.** *In CC-2g,  $\forall e \in V$ ,  $\hat{A}_e \subseteq A^{\iota(e)-1} \subseteq \tilde{A}_e \setminus e$ , and  $\hat{B}_e \supseteq B^{\iota(e)-1} \supseteq \tilde{B}_e \cup e$ .*

*Proof.* Clearly,  $e \in \tilde{B}_e \cup e$  but  $e \notin \tilde{A}_e \setminus e$ . By definition,  $e \in B^{\iota(e)-1}$  but  $e \notin A^{\iota(e)-1}$ . CC-2g only modifies  $\hat{A}(e)$  and  $\hat{B}(e)$  when committing the transaction on  $e$ , which occurs after obtaining the bounds in  $\text{getGuarantee}(e)$ , so  $e \in \hat{B}_e$  but  $e \notin \hat{A}_e$ .

Consider any  $e' \neq e$ . Suppose  $e' \in \hat{A}_e$ . This is only possible if we have committed the transaction on  $e'$  before the call  $\text{getGuarantee}(e)$ , so it must be the case that  $\iota(e') < \iota(e)$ . Thus,  $e' \in A^{\iota(e)-1}$ .

Now suppose  $e' \in A^{\iota(e)-1}$ . By definition, this implies  $\iota(e') < \iota(e)$  and  $e' \in A$ . Hence, it must be the case that we have already set  $\tilde{A}(e') \leftarrow 1$  (by the ordering imposed by  $\iota$  on Line 2), but never execute  $\tilde{A}(e') \leftarrow 0$  (since  $e' \in A$ ), so  $e' \in \tilde{A}_e$ .

An analogous argument shows  $e' \notin \hat{B}_e \implies e' \notin B^{\iota(e)-1} \implies e' \notin \tilde{B}_e \cup e$ .  $\square$

**Lemma 5.2.** *In CC-2g, when committing element  $e$ , we have  $\hat{A} = A^{\iota(e)-1}$  and  $\hat{B} = B^{\iota(e)-1}$ .*

*Proof.* Alg. 8 Line 1 ensures that all elements ordered before  $e$  are committed, and that no element ordered after  $e$  are committed. This suffices to guarantee that  $e' \in \hat{A} \iff e' \in A^{\iota(e)-1}$  and  $e' \in \hat{B} \iff e' \in B^{\iota(e)-1}$ .  $\square$

## B Proof of serial equivalence of CC-2g

**Theorem 6.2.** *CC-2g is serializable and therefore solves the unconstrained submodular maximization problem  $\max_{A \subseteq V} F(A)$  with approximation  $E[F(A_{CC})] \geq \frac{1}{2}F^*$ , where  $A_{CC}$  is the output of the algorithm, and  $F^*$  is the optimal value.*

*Proof.* We will denote by  $A_{seq}^i, B_{seq}^i$  the sets generated by Ser-2g, reserving  $A^i, B^i$  for sets generated by the CC-2g algorithm. It suffices to show by induction that  $A_{seq}^i = A^i$  and  $B_{seq}^i = B^i$ . For the base case,  $A^0 = \emptyset = A_{seq}^0$ , and  $B^0 = V = B_{seq}^0$ . Consider any element  $e$ . The CC-2g algorithm includes  $e \in A$  iff  $u_e < [\Delta_+^{\min}(e)]_+ + ([\Delta_+^{\min}(e)]_+ + [\Delta_-^{\max}(e)]_+)^{-1}$  on Alg. 5 Line 6 or  $u_e < [\Delta_+^{\text{exact}}(e)]_+ + ([\Delta_+^{\text{exact}}(e)]_+ + [\Delta_-^{\text{exact}}(e)]_+)^{-1}$  on Alg. 8 Line 5. In both cases, Corollary 5.3 implies  $u_e < [\Delta_+(e)]_+ + ([\Delta_+(e)]_+ + [\Delta_-(e)]_+)^{-1}$ . By induction,  $A^{\iota(e)-1} = A_{seq}^{\iota(e)-1}$  and  $B^{\iota(e)-1} = B_{seq}^{\iota(e)-1}$ , so the threshold is exactly that computed by Ser-2g. Hence, the CC-2g algorithm includes  $e \in A$  iff Ser-2g includes  $e \in A$ . (An analogous argument works for the case where  $e$  is excluded from  $B$ .)  $\square$

## C Proof of bound for CF-2g

We follow the proof outline of [2].

Consider an ordering  $\iota$  induced by running CF-2g. For convenience, we will use  $i$  to flexibly denote the element  $e$  and its ordering  $\iota(e)$ .

Let  $OPT$  be an optimal solution to the problem. Define  $O^i := (OPT \cup A^i) \cap B^i$ . Note that  $O^i$  coincides with  $A^i$  and  $B^i$  on elements  $1, \dots, i$ , and  $O^i$  coincides with  $OPT$  on elements  $i+1, \dots, n$ . Hence,

$$\begin{aligned} O^i \setminus (i+1) &\supseteq A^i \\ O^i \cup (i+1) &\subseteq B^i. \end{aligned}$$

**Lemma C.1.** *For every  $1 \leq i \leq n$ ,  $\Delta_+(i) + \Delta_-(i) \geq 0$ .*

*Proof.* This is just Lemma II.1 of [2]. □

**Lemma C.2.** *Let  $\rho_i = \max\{\Delta_+^{\max}(e) - \Delta_+(e), \Delta_-^{\max}(e) - \Delta_-(e)\}$ . For every  $1 \leq i \leq n$ ,*

$$E[F(O^{i-1}) - F(O^i)] \leq \frac{1}{2}E[F(A^i) - F(A^{i-1}) + F(B^i) - F(B^{i-1}) + \rho_i].$$

*Proof.* We follow the proof outline of [2]. First, note that it suffices to prove the inequality conditioned on knowing  $A^{i-1}$ ,  $\hat{A}_i$  and  $\hat{B}_i$ , then applying the law of total expectation. Under this conditioning, we also know  $B^{i-1}$ ,  $O^{i-1}$ ,  $\Delta_+(i)$ ,  $\Delta_+^{\max}(i)$ ,  $\Delta_-(i)$ , and  $\Delta_-^{\max}(i)$ .

We consider the following 6 cases.

**Case 1:**  $0 < \Delta_+(i) \leq \Delta_+^{\max}(i)$ ,  $0 \leq \Delta_-^{\max}(i)$ . Since both  $\Delta_+^{\max}(i) > 0$  and  $\Delta_-^{\max}(i) > 0$ , the probability of including  $i$  is just  $\Delta_+^{\max}(i)/(\Delta_+^{\max}(i) + \Delta_-^{\max}(i))$ , and the probability of excluding  $i$  is  $\Delta_-^{\max}(i)/(\Delta_+^{\max}(i) + \Delta_-^{\max}(i))$ .

$$\begin{aligned} E[F(A^i) - F(A^{i-1}) | A^{i-1}, \hat{A}_i, \hat{B}_i] &= \frac{\Delta_+^{\max}(i)}{\Delta_+^{\max}(i) + \Delta_-^{\max}(i)} (F(A^{i-1} \cup i) - F(A^{i-1})) \\ &= \frac{\Delta_+^{\max}(i)}{\Delta_+^{\max}(i) + \Delta_-^{\max}(i)} \Delta_+(i) \\ &\geq \frac{\Delta_+^{\max}(i)}{\Delta_+^{\max}(i) + \Delta_-^{\max}(i)} (\Delta_+^{\max}(i) - \rho_i) \\ E[F(B^i) - F(B^{i-1}) | A^{i-1}, \hat{A}_i, \hat{B}_i] &= \frac{\Delta_-^{\max}(i)}{\Delta_+^{\max}(i) + \Delta_-^{\max}(i)} (F(B^{i-1} \setminus i) - F(B^{i-1})) \\ &= \frac{\Delta_-^{\max}(i)}{\Delta_+^{\max}(i) + \Delta_-^{\max}(i)} \Delta_-(i) \\ &\geq \frac{\Delta_-^{\max}(i)}{\Delta_+^{\max}(i) + \Delta_-^{\max}(i)} (\Delta_-^{\max}(i) - \rho_i) \end{aligned}$$

$$\begin{aligned}
& E[F(O^{i-1}) - F(O^i) | A^{i-1}, \hat{A}_i, \hat{B}_i] \\
&= \frac{\Delta_+^{\max}(i)}{\Delta_+^{\max}(i) + \Delta_-^{\max}(i)} (F(O^{i-1}) - F(O^{i-1} \cup i)) \\
&\quad + \frac{\Delta_-^{\max}(i)}{\Delta_+^{\max}(i) + \Delta_-^{\max}(i)} (F(O^{i-1}) - F(O^{i-1} \setminus i)) \\
&= \begin{cases} \frac{\Delta_+^{\max}(i)}{\Delta_+^{\max}(i) + \Delta_-^{\max}(i)} (F(O^{i-1}) - F(O^{i-1} \cup i)) & \text{if } i \notin OPT \\ \frac{\Delta_-^{\max}(i)}{\Delta_+^{\max}(i) + \Delta_-^{\max}(i)} (F(O^{i-1}) - F(O^{i-1} \setminus i)) & \text{if } i \in OPT \end{cases} \\
&\leq \begin{cases} \frac{\Delta_+^{\max}(i)}{\Delta_+^{\max}(i) + \Delta_-^{\max}(i)} (F(B^{i-1} \setminus i) - F(B^{i-1})) & \text{if } i \notin OPT \\ \frac{\Delta_-^{\max}(i)}{\Delta_+^{\max}(i) + \Delta_-^{\max}(i)} (F(A^{i-1} \cup i) - F(A^{i-1})) & \text{if } i \in OPT \end{cases} \\
&= \begin{cases} \frac{\Delta_+^{\max}(i)}{\Delta_+^{\max}(i) + \Delta_-^{\max}(i)} \Delta_-(i) & \text{if } i \notin OPT \\ \frac{\Delta_-^{\max}(i)}{\Delta_+^{\max}(i) + \Delta_-^{\max}(i)} \Delta_+(i) & \text{if } i \in OPT \end{cases} \\
&\leq \begin{cases} \frac{\Delta_+^{\max}(i)}{\Delta_+^{\max}(i) + \Delta_-^{\max}(i)} \Delta_-^{\max}(i) & \text{if } i \notin OPT \\ \frac{\Delta_-^{\max}(i)}{\Delta_+^{\max}(i) + \Delta_-^{\max}(i)} \Delta_+^{\max}(i) & \text{if } i \in OPT \end{cases} \\
&= \frac{\Delta_+^{\max}(i) \Delta_-^{\max}(i)}{\Delta_+^{\max}(i) + \Delta_-^{\max}(i)}
\end{aligned}$$

where the first inequality is due to submodularity:  $O^{i-1} \setminus i \supseteq A^{i-1}$  and  $O^{i-1} \cup i \subseteq B^{i-1}$ .

Putting the above inequalities together:

$$\begin{aligned}
& E \left[ F(O^{i-1}) - F(O^i) - \frac{1}{2} \left( F(A^i) - F(A^{i-1}) + F(B^i) - F(B^{i-1}) + \rho_i \right) \middle| A^{i-1}, \hat{A}_i, \hat{B}_i \right] \\
&\leq \frac{1/2}{\Delta_+^{\max}(i) + \Delta_-^{\max}(i)} \left[ 2\Delta_+^{\max}(i) \Delta_-^{\max}(i) - \Delta_-^{\max}(i) (\Delta_-^{\max}(i) - \rho_i) \right. \\
&\quad \left. - \Delta_+^{\max}(i) (\Delta_+^{\max}(i) - \rho_i) \right] - \frac{1}{2} \rho_i \\
&= \frac{1/2}{\Delta_+^{\max}(i) + \Delta_-^{\max}(i)} \left[ -(\Delta_+^{\max}(i) - \Delta_-^{\max}(i))^2 + \rho_i (\Delta_+^{\max}(i) + \Delta_-^{\max}(i)) \right] - \frac{1}{2} \rho_i \\
&\leq \frac{\frac{1}{2} \rho_i (\Delta_+^{\max}(i) + \Delta_-^{\max}(i))}{\Delta_+^{\max}(i) + \Delta_-^{\max}(i)} - \frac{1}{2} \rho_i \\
&= 0.
\end{aligned}$$

**Case 2:**  $0 < \Delta_+(i) \leq \Delta_+^{\max}(i)$ ,  $\Delta_-^{\max}(i) < 0$ . In this case, the algorithm always choses to include  $i$ , so  $A^i = A^{i-1} \cup i$ ,  $B^i = B^{i-1}$  and  $O^i = O^{i-1} \cup i$ :

$$\begin{aligned}
& E[F(A^i) - F(A^{i-1}) | A^{i-1}, \hat{A}_i, \hat{B}_i] = F(A^{i-1} \cup i) - F(A^{i-1}) = \Delta_+(i) > 0 \\
& E[F(B^i) - F(B^{i-1}) | A^{i-1}, \hat{A}_i, \hat{B}_i] = F(B^{i-1}) - F(B^{i-1}) = 0 \\
& E[F(O^{i-1}) - F(O^i) | A^{i-1}, \hat{A}_i, \hat{B}_i] = F(O^{i-1}) - F(O^{i-1} \cup i) \\
&\leq \begin{cases} 0 & \text{if } i \in OPT \\ F(B^{i-1} \setminus i) - F(B^{i-1}) & \text{if } i \notin OPT \end{cases} \\
&= \begin{cases} 0 & \text{if } i \in OPT \\ \Delta_-(i) & \text{if } i \notin OPT \end{cases} \\
&\leq 0 \\
&< \frac{1}{2} E[F(A^i) - F(A^{i-1}) + F(B^i) - F(B^{i-1}) + \rho_i | A^{i-1}, \hat{A}_i, \hat{B}_i]
\end{aligned}$$

where the first inequality is due to submodularity:  $O^{i-1} \cup i \subseteq B^{i-1}$ .

**Case 3:**  $\Delta_+(i) \leq 0 < \Delta_+^{\max}(i)$ ,  $0 < \Delta_-(i) < \Delta_-^{\max}(i)$ . Analogous to Case 1.

**Case 4:**  $\Delta_+(i) \leq 0 < \Delta_+^{\max}(i)$ ,  $\Delta_-(i) \leq 0$ . This is not possible, by Lemma C.1.

**Case 5:**  $\Delta_+(i) \leq \Delta_+^{\max}(i) \leq 0$ ,  $0 < \Delta_-(i) \leq \Delta_-^{\max}(i)$ . Analogous to Case 2.

**Case 6:**  $\Delta_+(i) \leq \Delta_+^{\max}(i) \leq 0$ ,  $\Delta_-(i) \leq 0$ . This is not possible, by Lemma C.1.

□

We will now prove the main theorem.

**Theorem 6.1.** *Let  $F$  be a non-negative submodular function. CF-2g solves the unconstrained problem  $\max_{A \subseteq V} F(A)$  with worst-case approximation factor  $E[F(A_{CF})] \geq \frac{1}{2}F^* - \frac{1}{4} \sum_{i=1}^N E[\rho_i]$ , where  $A_{CF}$  is the output of the algorithm,  $F^*$  is the optimal value, and  $\rho_i = \max\{\Delta_+^{\max}(e) - \Delta_+(e), \Delta_-^{\max}(e) - \Delta_-(e)\}$  is the maximum discrepancy in the marginal gain due to the bounds.*

*Proof.* Summing up the statement of Lemma C.2 for all  $i$  gives us a telescoping sum, which reduces to:

$$\begin{aligned} E[F(O^0) - F(O^n)] &\leq \frac{1}{2}E[F(A^n) - F(A^0) + F(B^n) - F(B^0)] + \frac{1}{2} \sum_{i=1}^n E[\rho_i] \\ &\leq \frac{1}{2}E[F(A^n) + F(B^n)] + \frac{1}{2} \sum_{i=1}^n E[\rho_i]. \end{aligned}$$

Note that  $O^0 = OPT$  and  $O^n = A^n = B^n$ , so  $E[F(A^n)] \geq \frac{1}{2}F^* - \frac{1}{4} \sum_i E[\rho_i]$ . □

### C.1 Example: max graph cut

Let  $C_i = (A^{i-1} \setminus \hat{A}_i) \cup (\hat{B}_i \setminus B^{i-1})$  be the set of elements concurrently processed with  $i$  but ordered after  $i$ , and  $D_i = B^i \setminus A^i$  be the set of elements ordered after  $i$ . Denote  $\bar{A}_i = V \setminus (\hat{A}_i \cup C_i \cup D_i) = \{1, \dots, i\} \setminus \hat{A}_i$  be the elements up to  $i$  that are not included in  $\hat{A}_i$ . Let  $w_i(S) = \sum_{j \in S, (i,j) \in E} w(i, j)$ . For the max graph cut function, it is easy to see that

$$\begin{aligned} \Delta_+ &\geq -w_i(\hat{A}_i) - w_i(C_i) + w_i(D_i) + w_i(\bar{A}_i) \\ \Delta_+^{\max} &= -w_i(\hat{A}_i) + w_i(C_i) + w_i(D_i) + w_i(\bar{A}_i) \\ \Delta_- &\geq +w_i(\hat{A}_i) - w_i(C_i) + w_i(D_i) - w_i(\bar{A}_i) \\ \Delta_-^{\max} &= +w_i(\hat{A}_i) + w_i(C_i) + w_i(D_i) - w_i(\bar{A}_i) \end{aligned}$$

Thus, we can see that  $\rho_i \leq 2w_i(C_i)$ .

Suppose we have bounded delay  $\tau$ , so  $|C_i| \leq \tau$ . Then  $w_i(C_i)$  has a hypergeometric distribution with mean  $\frac{\deg(i)}{N}\tau$ , and  $E[\rho_i] \leq 2\tau \frac{\deg(i)}{N}$ . The approximation of the hogwild algorithm is then  $E[F(A^n)] \geq \frac{1}{2}F^* - \tau \frac{\#edges}{2N}$ . In sparse graphs, the hogwild algorithm is off by a small additional term, which albeit grows linearly in  $\tau$ . In a complete graph,  $F^* = \frac{1}{2}\#edges$ , so  $E[F(A^n)] \geq F^* (\frac{1}{2} - \frac{\tau}{N})$ , which makes it possible to scale  $\tau$  linearly with  $N$  while retaining the same approximation factor.

### C.2 Example: set cover

Consider the simple set cover function, for  $\lambda < L/N$ :

$$F(A) = \sum_{l=1}^L \min(1, |A \cap S_l|) - \lambda|A| = |\{l : A \cap S_l \neq \emptyset\}| - \lambda|A|.$$

We assume that there is some bounded delay  $\tau$ .

Suppose also that the sets  $S_l$  form a partition, so each element  $e$  belongs to exactly one set. Let  $n_l = |S_l|$  denote the size of  $S_l$ . Given any ordering  $\pi$ , let  $e_l^t$  be the  $t$ th element of  $S_l$  in the ordering, i.e.  $|\{e' : \pi(e') \leq \pi(e_l^t) \wedge e' \in S_l\}| = t$ .

For any  $e \in S_l$ , we get

$$\begin{aligned}\Delta_+(e) &= -\lambda + 1\{A^{\iota(e)-1} \cap S_l = \emptyset\} \\ \Delta_+^{\max}(e) &= -\lambda + 1\{\widehat{A}_e \cap S_l = \emptyset\} \\ \Delta_-(e) &= +\lambda - 1\{B^{\iota(e)-1} \setminus e \cap S_l = \emptyset\} \\ \Delta_-^{\max}(e) &= +\lambda - 1\{\widehat{B}_e \setminus e \cap S_l = \emptyset\}\end{aligned}$$

Let  $\eta$  be the position of the first element of  $S_l$  to be accepted, i.e.  $\eta = \min\{t : e_l^t \in A \cap S_l\}$ . (For convenience, we set  $\eta = n_l$  if  $A \cap S_l = \emptyset$ .) We first show that  $\eta$  is independent of  $\pi$ : for  $\eta < n_l$ ,

$$\begin{aligned}P(\eta|\pi) &= \frac{\Delta_+^{\max}(e_l^\eta)}{\Delta_+^{\max}(e_l^\eta) + \Delta_-^{\max}(e_l^\eta)} \prod_{t=1}^{\eta-1} \frac{\Delta_-^{\max}(e_l^t)}{\Delta_+^{\max}(e_l^t) + \Delta_-^{\max}(e_l^t)} \\ &= \frac{1-\lambda}{1-\lambda+\lambda} \prod_{t=1}^{\eta-1} \frac{\lambda}{1-\lambda+\lambda} \\ &= (1-\lambda)\lambda^{\eta-1},\end{aligned}$$

and  $P(\eta = n_l|\pi) = \lambda^{\eta-1}$ .

Note that,  $\Delta_-^{\max}(e) - \Delta_-(e) = 1$  iff  $e = e_l^{n_l}$  is the last element of  $S_l$  in the ordering, there are no elements accepted up to  $\widehat{B}_{e_l^{n_l}} \setminus e_l^{n_l}$ , and there is some element  $e'$  in  $\widehat{B}_{e_l^{n_l}} \setminus e_l^{n_l}$  that is rejected and not in  $B^{\iota(e_l^{n_l})-1}$ . Denote by  $m_l \leq \min(\tau, n_l - 1)$  the number of elements before  $e_l^{n_l}$  that are inconsistent between  $\widehat{B}_{e_l^{n_l}}$  and  $B^{\iota(e_l^{n_l})-1}$ . Then  $\mathbb{E}[\Delta_-^{\max}(e_l^{n_l}) - \Delta_-(e_l^{n_l})] = P(\Delta_-^{\max}(e_l^{n_l}) \neq \Delta_-(e_l^{n_l}))$  is

$$\lambda^{n_l-1-m_l}(1-\lambda^{m_l}) = \lambda^{n_l-1}(\lambda^{-m_l} - 1) \leq \lambda^{n_l-1}(\lambda^{-\min(\tau, n_l-1)} - 1) \leq 1 - \lambda^\tau.$$

If  $\lambda = 1$ ,  $\Delta_+^{\max}(e) \leq 0$ , so no elements before  $e_l^{n_l}$  will be accepted, and  $\Delta_-^{\max}(e_l^{n_l}) = \Delta_-(e_l^{n_l})$ .

On the other hand,  $\Delta_+^{\max}(e) - \Delta_+(e) = 1$  iff  $(A^{\iota(e)-1} \setminus \widehat{A}_e) \cap S_l \neq \emptyset$ , that is, if an element has been accepted in  $A$  but not yet observed in  $\widehat{A}_e$ . Since we assume a bounded delay, only the first  $\tau$  elements after the first acceptance of an  $e \in S_l$  may be affected.

$$\begin{aligned}\mathbb{E} \left[ \sum_{e \in S_l} \Delta_+^{\max}(e) - \Delta_+(e) \right] &= \mathbb{E}[\#\{e : e \in S_l \wedge e_l^\eta \in A^{\iota(e)-1} \wedge e_l^\eta \notin \widehat{A}_e\}] \\ &= \mathbb{E}[\mathbb{E}[\#\{e : e \in S_l \wedge e_l^\eta \in A^{\iota(e)-1} \wedge e_l^\eta \notin \widehat{A}_e\} \mid \eta = t, \pi(e_l^t) = k]] \\ &= \sum_{t=1}^{n_l} \sum_{k=t}^{N-n+t} P(\eta = t, \pi(e_l^t) = k) \mathbb{E}[\#\{e : e \in S_l \wedge e_l^\eta \in A^{\iota(e)-1} \wedge e_l^\eta \notin \widehat{A}_e\} \mid \eta = t, \pi(e_l^t) = k] \\ &= \sum_{t=1}^{n_l} P(\eta = t) \sum_{k=t}^{N-n+t} P(\pi(e_l^t) = k) \mathbb{E}[\#\{e : e \in S_l \wedge e_l^\eta \in A^{\iota(e)-1} \wedge e_l^\eta \notin \widehat{A}_e\} \mid \eta = t, \pi(e_l^t) = k].\end{aligned}$$

Under the assumption that every ordering  $\pi$  is equally likely, and a bounded delay  $\tau$ , conditioned on  $\eta = t, \pi(e_l^t) = k$ , the random variable  $\#\{e : e \in S_l \wedge e_l^\eta \in A^{\iota(e)-1} \wedge e_l^\eta \notin \widehat{A}_e\}$  has hypergeometric distribution with mean  $\frac{n_l-t}{N-k}\tau$ . Also,  $P(\pi(e_l^t) = k) = \frac{n_l}{N} \binom{n-1}{t-1} \binom{N-n}{k-t} / \binom{N-1}{k-1}$ , so

the above expression becomes

$$\begin{aligned}
& \mathbb{E} \left[ \sum_{e \in S_l} \Delta_+^{\max}(e) - \Delta_+(e) \right] \\
&= \sum_{t=1}^{n_l} P(\eta = t) \sum_{k=t}^{N-n+t} \frac{n_l}{N} \frac{\binom{n-1}{t-1} \binom{N-n}{k-t}}{\binom{N-1}{k-1}} \frac{n-t}{N-k} \tau \\
&= \frac{n_l}{N} \tau \sum_{t=1}^{n_l} P(\eta = t) \sum_{k=t}^{N-n+t} \frac{\binom{k-1}{t-1} \binom{N-k}{n-t}}{\binom{N-1}{n-1}} \frac{n-t}{N-k} \quad (\text{symmetry of hypergeometric}) \\
&= \frac{n_l}{N} \tau \sum_{t=1}^{n_l} \frac{P(\eta = t)}{\binom{N-1}{n-1}} \sum_{k=t}^{N-n+t} \binom{k-1}{t-1} \binom{N-k-1}{n-t-1} \\
&= \frac{n_l}{N} \tau \sum_{t=1}^{n_l} \frac{P(\eta = t)}{\binom{N-1}{n-1}} \binom{N-1}{n-1} \quad (\text{Lemma E.1, } a = N-2, b = n_l-2, j = 1) \\
&= \frac{n_l}{N} \tau \sum_{t=1}^{n_l} P(\eta = t) \\
&= \frac{n_l}{N} \tau.
\end{aligned}$$

Since  $\Delta_+^{\max}(e) \geq \Delta_+(e)$  and  $\Delta_-^{\max}(e) \geq \Delta_-(e)$ , we have that  $\rho_e \leq \Delta_+^{\max}(e) - \Delta_+(e) + \Delta_-^{\max}(e) - \Delta_-(e)$ , so

$$\begin{aligned}
\mathbb{E} \left[ \sum_e \rho_e \right] &= \mathbb{E} \left[ \sum_e \Delta_+^{\max}(e) - \Delta_+(e) + \Delta_-^{\max}(e) - \Delta_-(e) \right] \\
&= \sum_l \mathbb{E} \left[ \sum_{e \in S_l} \Delta_+^{\max}(e) - \Delta_+(e) \right] + \mathbb{E} \left[ \sum_{e \in S_l} \Delta_-^{\max}(e) - \Delta_-(e) \right] \\
&\leq \tau \frac{\sum_l n_l}{N} + L(1 - \lambda^\tau) \\
&= \tau + L(1 - \lambda^\tau).
\end{aligned}$$

Note that  $\mathbb{E}[\sum_e \rho_e]$  does not depend on  $N$  and is linear in  $\tau$ . Also, if  $\tau = 0$  in the sequential case, we get  $\mathbb{E}[\sum_e \rho_e] \leq 0$ .

## D Upper bound on expected number of failed transactions

Let  $N$  be the number of elements, i.e. the cardinality of the ground set. Let  $C_i = (A^{i-1} \setminus \hat{A}_i) \cup (\hat{B}_i \setminus B^{i-1})$ . We assume a bounded delay  $\tau$ , so that  $|C_i| \leq \tau$  for all  $i$ .

We call element  $i$  *dependent* on  $i'$  if  $\exists A, F(A \cup i) - F(A) \neq F(A \cup i' \cup i) - F(A \cup i')$  or  $\exists B, F(B \setminus i) - F(B) \neq F(B \cup i' \setminus i) - F(B \cup i')$ , i.e. the result of the processing  $i'$  will affect the computation of  $\Delta$ 's for  $i$ . For example, for the graph cut problem, every vertex is dependent on its neighbors; for the separable sums problem,  $i$  is dependent on  $\{i' : \exists S_l, i \in S_l, i' \in S_l\}$ .

Let  $n_i$  be the number of elements that  $i$  is dependent on. Now, we note that if  $C_i$  does not contain any elements on which  $i$  is dependent, then  $\Delta_+^{\max}(i) = \Delta_+(i) = \Delta_+^{\min}(i)$  and  $\Delta_-^{\max}(i) = \Delta_-(i) = \Delta_-^{\min}(i)$ , so  $i$  will not fail. Conversely, if  $i$  fails, there must be some element  $i' \in C_i$  such that  $i$  is dependent on  $i'$ .

$$\begin{aligned} E(\text{number of failed transactions}) &= \sum_i P(i \text{ fails}) \\ &\leq \sum_i P(\exists i' \in C_i, i \text{ depends on } i') \\ &\leq \sum_i E \left[ \sum_{i' \in C_i} 1\{i \text{ depends on } i'\} \right] \\ &\leq \sum_i \frac{\tau n_i}{N} \end{aligned}$$

The last inequality follows from the fact that  $\sum_{i' \in C_i} 1\{i \text{ depends on } i'\}$  is a hypergeometric random variable and  $|C_i| \leq \tau$ .

Note that the bound established above is generic to functions  $F$ , and additional knowledge of  $F$  can lead to better analyses on the algorithm's concurrency.

### D.1 Upper bound for max graph cut

By applying the above generic bound, we see that the number of failed transactions for max graph cut is upper bounded by  $\frac{\tau}{N} \sum_i n_i = \tau \frac{2\#\text{edges}}{N}$ .

### D.2 Upper bound for set cover

For the set cover problem, we can provide a tighter bound on the number of failed items. We make the same assumptions as before in the CF-2g analysis, i.e. the sets  $S_l$  form a partition of  $V$ , there is a bounded delay  $\tau$ .

Observe that for any  $e \in S_l$ ,  $\Delta_-^{\min}(e) \neq \Delta_-^{\max}(e)$  if  $\hat{B}_e \setminus e \cap S_l \neq \emptyset$  and  $\tilde{B}_e \setminus e \cap S_l = \emptyset$ . This is only possible if  $e_l^{n_l} \notin \tilde{B}_e$  and  $\tilde{B}_e \supset \hat{A}_e \cap S_l = \emptyset$ , that is  $\pi(e) \geq \pi(e_l^{n_l}) - \tau$  and  $\forall e' \in S_l, (\pi(e') < \pi(e_l^{n_l}) - \tau) \implies (e' \notin A)$ . The latter condition is achieved with probability  $\lambda^{n_l - m_l}$ , where

$m_l = \#\{e' : \pi(e') \geq \pi(e_l^{n_l}) - \tau\}$ . Thus,

$$\begin{aligned}
\mathbb{E} [\#\{e : \Delta_-^{\min}(e) \neq \Delta_-^{\max}(e)\}] &= \mathbb{E}[m_l \mathbf{1}(\forall e' \in S_l, (\pi(e') < \pi(e_l^{n_l}) - \tau) \implies (e' \notin A))] \\
&= \mathbb{E}[\mathbb{E}[m_l \mathbf{1}(\forall e' \in S_l, (\pi(e') < \pi(e_l^{n_l}) - \tau) \implies (e' \notin A)) | u_{1:N}]] \\
&= \mathbb{E}[m_l \mathbb{E}[\mathbf{1}(\forall e' \in S_l, (\pi(e') < \pi(e_l^{n_l}) - \tau) \implies (e' \notin A)) | u_{1:N}]] \\
&= \mathbb{E}[m_l \lambda^{n_l - m_l}] \\
&\leq \lambda^{(n_l - \tau)_+} \mathbb{E}[m_l] \\
&= \lambda^{(n_l - \tau)_+} \mathbb{E}[\mathbb{E}[m_l | \pi(e_l^{n_l}) = k]] \\
&= \lambda^{(n_l - \tau)_+} \sum_{k=n_l}^N P(\pi(e_l^{n_l}) = k) \mathbb{E}[m_l | \pi(e_l^{n_l}) = k].
\end{aligned}$$

Conditioned on  $\pi(e_l^{n_l}) = k$ ,  $m_l$  is a hypergeometric random variable with mean  $\frac{n_l - 1}{k - 1} \tau$ . Also  $P(\pi(e_l^{n_l}) = k) = \frac{n_l}{N} \binom{n_l - 1}{0} \binom{N - n_l}{N - k} / \binom{N - 1}{N - k}$ . The above expression is therefore

$$\begin{aligned}
&\mathbb{E} [\#\{e : \Delta_-^{\min}(e) \neq \Delta_-^{\max}(e)\}] \\
&= \lambda^{(n_l - \tau)_+} \sum_{k=n_l}^N \frac{n_l}{N} \frac{\binom{n_l - 1}{0} \binom{N - n_l}{N - k}}{\binom{N - 1}{N - k}} \frac{n_l - 1}{k - 1} \tau \\
&= \lambda^{(n_l - \tau)_+} \frac{n_l}{N} \tau \sum_{k=n_l}^N \frac{\binom{N - k}{0} \binom{k - 1}{n_l - 1}}{\binom{N - 1}{n_l - 1}} \frac{n_l - 1}{k - 1} \quad (\text{symmetry of hypergeometric}) \\
&= \lambda^{(n_l - \tau)_+} \frac{n_l}{N} \frac{\tau}{\binom{N - 1}{n_l - 1}} \sum_{k=n_l}^N \binom{N - k}{0} \binom{k - 2}{n_l - 2} \\
&= \lambda^{(n_l - \tau)_+} \frac{n_l}{N} \frac{\tau}{\binom{N - 1}{n_l - 1}} \binom{N - 1}{n_l - 1} \quad (\text{Lemma E.1, } a = N - 2, b = n_l - 2, j = 2, t = n_l) \\
&= \lambda^{(n_l - \tau)_+} \frac{n_l}{N} \tau.
\end{aligned}$$

Now we consider any element  $e \in S_l$  with  $\pi(e) < \pi(e_l^{n_l}) - \tau$  that fails. (Note that  $e_l^{n_l} \in \widehat{B}_e$  and  $\widetilde{B}_e$ , so  $\Delta_-^{\min}(e) = \Delta_-^{\max}(e) = \lambda$ .) It must be the case that  $\widehat{A}_e \cap S_l = \emptyset$ , for otherwise  $\Delta_+^{\min}(e) = \Delta_+^{\max}(e) = -\lambda$  and it does not fail. This implies that  $\Delta_+^{\max}(e) = 1 - \lambda \geq u_i$ . At commit, if  $A^{\iota(e) - 1} \cap S_l = \emptyset$ , we accept  $e$  into  $A$ . Otherwise,  $A^{\iota(e) - 1} \cap S_l \neq \emptyset$ , which implies that some other element  $e' \in S_l$  has been accepted. Thus, we conclude that every element  $e \in S_l$  that fails must be within  $\tau$  of the first accepted element  $e_l^\eta$  in  $S_l$ . The expected number of such elements is exactly as we computed in the CF-2ganalysis:  $\frac{n_l}{N} \tau$ .

Hence, the expected number of elements that fails is upper bounded as

$$\begin{aligned}
\mathbb{E}[\#\text{failed transactions}] &\leq \sum_l (1 + \lambda^{(n_l - \tau)_+}) \frac{n_l}{N} \tau \\
&\leq \sum_l 2 \frac{n_l}{N} \tau \\
&= 2\tau.
\end{aligned}$$



## E Lemma

**Lemma E.1.**  $\sum_{k=t}^{a-b+t} \binom{k-j}{t-j} \binom{a-k+j}{b-t+j} = \binom{a+1}{b+1}$ .

*Proof.*

$$\begin{aligned}
& \sum_{k=t}^{a-b+t} \binom{k-j}{t-j} \binom{a-k+j}{b-t+j} \\
&= \sum_{k'=0}^{a-b} \binom{k'+t-j}{t-j} \binom{a-k'-t+j}{b-t+j} \\
&= \sum_{k'=0}^{a-b} \binom{k'+t-j}{k'} \binom{a-k'-t+j}{a-b-k'} \quad (\text{symmetry of binomial coeff.}) \\
&= (-1)^{a-b} \sum_{k'=0}^{a-b} \binom{-t+j-1}{k'} \binom{-b+t-j-1}{a-b-k'} \quad (\text{upper negation}) \\
&= (-1)^{a-b} \binom{-b-2}{a-b} \quad (\text{Chu-Vandermonde's identity}) \\
&= \binom{a+1}{a-b} \quad (\text{upper negation}) \\
&= \binom{a+1}{b+1} \quad (\text{symmetry of binomial coeff.})
\end{aligned}$$

□

## F Parallel algorithms for separable sums

For some functions  $F$ , we can maintain sketches / statistics to aid the computation of  $\Delta_+^{\max}$ ,  $\Delta_-^{\max}$ ,  $\Delta_+^{\min}$ ,  $\Delta_-^{\min}$ . In particular, we consider functions of the form  $F(X) = \sum_{l=1}^L g(\sum_{i \in X \cup S_l} w_l(i)) - \lambda \sum_{i \in X} v(i)$ , where  $S_l \subseteq V$  are (possibly overlapping) groups of elements in the ground set,  $g$  is a non-decreasing concave scalar function, and  $w_l(i)$  and  $v(i)$  are non-negative scalar weights. An example of such functions is set cover  $F(A) = \sum_{l=1}^L \min(1, |A \cup S_l|) - \lambda |A|$ . It is easy to see that  $F(X \cup e) - F(X) = \sum_{l: e \in S_l} [g(w_l(e) + \sum_{i \in X \cup S_l} w_l(i)) - g(\sum_{i \in X \cup S_l} w_l(i))] - \lambda v(e)$ . Define

$$\begin{aligned} \hat{\alpha}_l &= \sum_{j \in \hat{A} \cup S_l} w_l(j), & \hat{\alpha}_{l,e} &= \sum_{j \in \hat{A}_e \cup S_l} w_l(j), & \alpha_l^{\iota(e)-1} &= \sum_{j \in A^{\iota(e)-1} \cup S_l} w_l(j). \\ \hat{\beta}_l &= \sum_{j \in \hat{B} \cup S_l} w_l(j), & \hat{\beta}_{l,e} &= \sum_{j \in \hat{B}_e \cup S_l} w_l(j), & \beta_l^{\iota(e)-1} &= \sum_{j \in B^{\iota(e)-1} \cup S_l} w_l(j). \end{aligned}$$

### F.1 CF-2g for separable sums $F$

Algorithm 9 updates  $\hat{\alpha}_l$  and  $\hat{\beta}_l$ , and computes  $\Delta_+^{\max}(e)$  and  $\Delta_-^{\max}(e)$  using  $\hat{\alpha}_{l,e}$  and  $\hat{\beta}_{l,e}$ . Following arguments analogous to that of Lemma 4.1, we can show:

**Lemma F.1.** *For each  $l$  and  $e \in V$ ,  $\hat{\alpha}_{l,e} \leq \alpha_l^{\iota(e)-1}$  and  $\hat{\beta}_{l,e} \geq \beta_l^{\iota(e)-1}$ .*

**Corollary F.2.** *Concavity of  $g$  implies that  $\Delta$ 's computed by Algorithm 9 satisfy*

$$\begin{aligned} \Delta_+^{\max}(e) &\geq \sum_{S_l \ni e} \left[ g(\alpha_l^{\iota(e)-1} + w_l(e)) - g(\alpha_l^{\iota(e)-1}) \right] - \lambda v(e) = \Delta_+(e), \\ \Delta_-^{\max}(e) &\geq \sum_{S_l \ni e} \left[ g(\beta_l^{\iota(e)-1} - w_l(e)) - g(\beta_l^{\iota(e)-1}) \right] + \lambda v(e) = \Delta_-(e), \end{aligned}$$

The analysis of Section 6.1 follows immediately from the above.

---

#### Algorithm 9: CF-2g for separable sums

---

```

1 for  $e \in V$  do  $\hat{A}(e) = 0$ 
2
3 for  $l = 1, \dots, L$  do  $\hat{\alpha}_l = 0, \hat{\beta}_l = \sum_{e \in S_l} w_l(e)$ 
4
5 for  $p \in \{1, \dots, P\}$  do in parallel
6   while  $\exists$  element to process do
7      $e =$  next element to process
8      $\Delta_+^{\max}(e) = -\lambda v(e) + \sum_{S_l \ni e} g(\hat{\alpha}_l + w_l(e)) - g(\hat{\alpha}_l)$ 
9      $\Delta_-^{\max}(e) = +\lambda v(e) + \sum_{S_l \ni e} g(\hat{\beta}_l - w_l(e)) - g(\hat{\beta}_l)$ 
10    Draw  $u_e \sim \text{Unif}(0, 1)$ 
11    if  $u_e < \frac{[\Delta_+^{\max}(e)]_+}{[\Delta_+^{\min}(e)]_+ + [\Delta_-^{\max}(e)]_+}$  then
12       $\hat{A}(e) \leftarrow 1$ 
13      for  $l : e \in S_l$  do
14         $\hat{\alpha}_l \leftarrow \hat{\alpha}_l + w_l(e)$ 
15    else
16      for  $l : e \in S_l$  do
17         $\hat{\beta}_l \leftarrow \hat{\beta}_l - w_l(e)$ 

```

---

## F.2 CC-2g for separable sums $F$

Analogous to the CF-2g algorithm, we maintain  $\hat{\alpha}_l, \hat{\beta}_l$  and additionally  $\tilde{\alpha}_l = \sum_{j \in \tilde{A} \cup S_l} w_l(j)$  and  $\tilde{\beta}_l = \sum_{j \in \tilde{B} \cup S_l} w_l(j)$ . Following the arguments of Lemma 5.1 and Corollary 5.3, we can show the following.

**Lemma F.3.**  $\hat{\alpha}_{l,e} \leq \alpha^{\iota(e)-1} \leq \tilde{\alpha}_{l,e} - w_l(e)$  and  $\hat{\beta}_{l,e} \geq \beta^{\iota(e)-1} \geq \tilde{\beta}_{l,e} + w_l(e)$

**Corollary F.4.** *Concavity of  $g$  implies that the  $\Delta$ 's computed by Algorithm 10 satisfy:*

$$\begin{aligned}
\Delta_+^{\max}(e) &= -\lambda v(e) + \sum_{S_l \ni e} [g(\hat{\alpha}_{l,e} + w_l(e)) - g(\hat{\alpha}_{l,e})] \\
&\geq -\lambda v(e) + \sum_{S_l \ni e} [g(\hat{\alpha}_l^{\iota(e)-1} + w_l(e)) - g(\hat{\alpha}_l^{\iota(e)-1})] &= \Delta_+(e) \\
&\geq -\lambda v(e) + \sum_{S_l \ni e} [g(\tilde{\alpha}_{l,e}) - g(\tilde{\alpha}_{l,e} - w_l(e))] &= \Delta_+^{\min}(e), \\
\Delta_-^{\max}(e) &= \lambda v(e) + \sum_{S_l \ni e} [g(\hat{\beta}_{l,e} - w_l(e)) - g(\hat{\beta}_{l,e})] \\
&\geq \lambda v(e) + \sum_{S_l \ni e} [g(\hat{\beta}_l^{\iota(e)-1} - w_l(e)) - g(\hat{\beta}_l^{\iota(e)-1})] &= \Delta_-(e) \\
&\geq \lambda v(e) + \sum_{S_l \ni e} [g(\tilde{\beta}_l^{\iota(e)-1}) - g(\tilde{\beta}_l^{\iota(e)-1} + w_l(e))] &= \Delta_-^{\min}(e).
\end{aligned}$$

The analysis of Section 6.3 and 6.2 follows immediately from the above.

---

### Algorithm 10: CC-2g for separable sums

---

```

1 for  $e \in V$  do  $\hat{A}(e) = \tilde{A}(e) = 0, \hat{B}(e) = \tilde{B}(e) = 1$ 
2
3 for  $l = 1, \dots, L$  do
4    $\hat{\alpha}_l = \tilde{\alpha}_l = 0$ 
5    $\hat{\beta}_l = \tilde{\beta}_l = \sum_{e \in S_l} w_l(e)$ 
6 for  $i = 1, \dots, |V|$  do  $\text{processed}(i) = \text{false}$ 
7
8  $\iota = 0$ 
9 for  $p \in \{1, \dots, P\}$  do in parallel
10  while  $\exists$  element to process do
11     $e = \text{next element to process}$ 
12     $(\hat{\alpha}_{\cdot,e}, \tilde{\alpha}_{\cdot,e}, \hat{\beta}_{\cdot,e}, \tilde{\beta}_{\cdot,e}) = \text{getGuarantee}(e)$ 
13     $(\text{result}, u_e) = \text{propose}(e, \hat{\alpha}_{\cdot,e}, \tilde{\alpha}_{\cdot,e}, \hat{\beta}_{\cdot,e}, \tilde{\beta}_{\cdot,e})$ 
14     $\text{commit}(e, i, u_e, \text{result})$ 

```

---



---

### Algorithm 11: CC-2g getGuarantee( $e$ ) for separable sums

---

```

1  $\tilde{A}(e) \leftarrow 1; \tilde{B}(e) \leftarrow 0$ 
2 for  $l : e \in S_l$  do
3    $\tilde{\alpha}_l \leftarrow \tilde{\alpha}_l + w_l(e)$ 
4    $\tilde{\beta}_l \leftarrow \tilde{\beta}_l - w_l(e)$ 
5  $i = \iota; \iota \leftarrow \iota + 1$ 
6  $\hat{\alpha}_{\cdot,e} = \hat{\alpha}_{\cdot}; \hat{\beta}_{\cdot,e} = \hat{\beta}_{\cdot}$ 
7  $\tilde{\alpha}_{\cdot,e} = \tilde{\alpha}_{\cdot}; \tilde{\beta}_{\cdot,e} = \tilde{\beta}_{\cdot}$ 
8 return  $(\hat{\alpha}_{\cdot,e}, \tilde{\alpha}_{\cdot,e}, \hat{\beta}_{\cdot,e}, \tilde{\beta}_{\cdot,e})$ 

```

---

---

**Algorithm 12:** CC-2g propose( $e, \hat{\alpha}_{\cdot,e}, \tilde{\alpha}_{\cdot,e}, \hat{\beta}_{\cdot,e}, \tilde{\beta}_{\cdot,e}$ ) for separable sums

---

```

1  $\Delta_+^{\min}(e) = -\lambda v(e) + \sum_{S_l \ni e} g(\tilde{\alpha}_l) - g(\tilde{\alpha}_l - w_l(e))$ 
2  $\Delta_+^{\max}(e) = -\lambda v(e) + \sum_{S_l \ni e} g(\hat{\alpha}_l + w_l(e)) - g(\hat{\alpha}_l)$ 
3  $\Delta_-^{\min}(e) = +\lambda v(e) + \sum_{S_l \ni e} g(\tilde{\beta}_l) - g(\tilde{\beta}_l + w_l(e))$ 
4  $\Delta_-^{\max}(e) = +\lambda v(e) + \sum_{S_l \ni e} g(\hat{\beta}_l - w_l(e)) - g(\hat{\beta}_l)$ 
5 Draw  $u_e \sim \text{Unif}(0, 1)$ 
6 if  $u_e < \frac{[\Delta_+^{\min}(e)]_+}{[\Delta_+^{\min}(e)]_+ + [\Delta_-^{\max}(e)]_+}$  then result  $\leftarrow 1$ 
7
8 else if  $u_e > \frac{[\Delta_+^{\max}(e)]_+}{[\Delta_+^{\max}(e)]_+ + [\Delta_-^{\min}(e)]_+}$  then result  $\leftarrow -1$ 
9
10 else result  $\leftarrow \text{FAIL}$ 
11
12 return (result,  $u_e$ )

```

---



---

**Algorithm 13:** CC-2g commit( $e, i, u_e, \text{result}$ ) for separable sums

---

```

1 wait until  $\forall j < i, \text{processed}(j) = \text{true}$ 
2 if result = FAIL then
3    $\Delta_+^{\text{exact}}(e) = -\lambda v(e) + \sum_{S_l \ni e} g(\hat{\alpha}_l + w_l(e)) - g(\hat{\alpha}_l)$ 
4    $\Delta_-^{\text{exact}}(e) = +\lambda v(e) + \sum_{S_l \ni e} g(\hat{\beta}_l - w_l(e)) - g(\hat{\beta}_l)$ 
5   if  $u_e < \frac{[\Delta_+^{\text{exact}}(e)]_+}{[\Delta_+^{\text{exact}}(e)]_+ + [\Delta_-^{\text{exact}}(e)]_+}$  then result  $\leftarrow 1$ 
6
7   else result  $\leftarrow -1$ 
8
9 if result = 1 then
10    $\hat{A}(e) \leftarrow 1$ 
11    $\tilde{B}(e) \leftarrow 1$ 
12   for  $l : e \in S_l$  do
13      $\hat{\alpha}_l \leftarrow \hat{\alpha}_l + w_l(e)$ 
14      $\tilde{\beta}_l \leftarrow \tilde{\beta}_l + w_l(e)$ 
15 else
16    $\tilde{A}(e) \leftarrow 0; \hat{B}(e) \leftarrow 0$ 
17   for  $l : e \in S_l$  do
18      $\tilde{\alpha}_l \leftarrow \tilde{\alpha}_l - w_l(e)$ 
19      $\hat{\beta}_l \leftarrow \hat{\beta}_l - w_l(e)$ 
20 processed( $i$ ) = true

```

---

## G Full experiment results

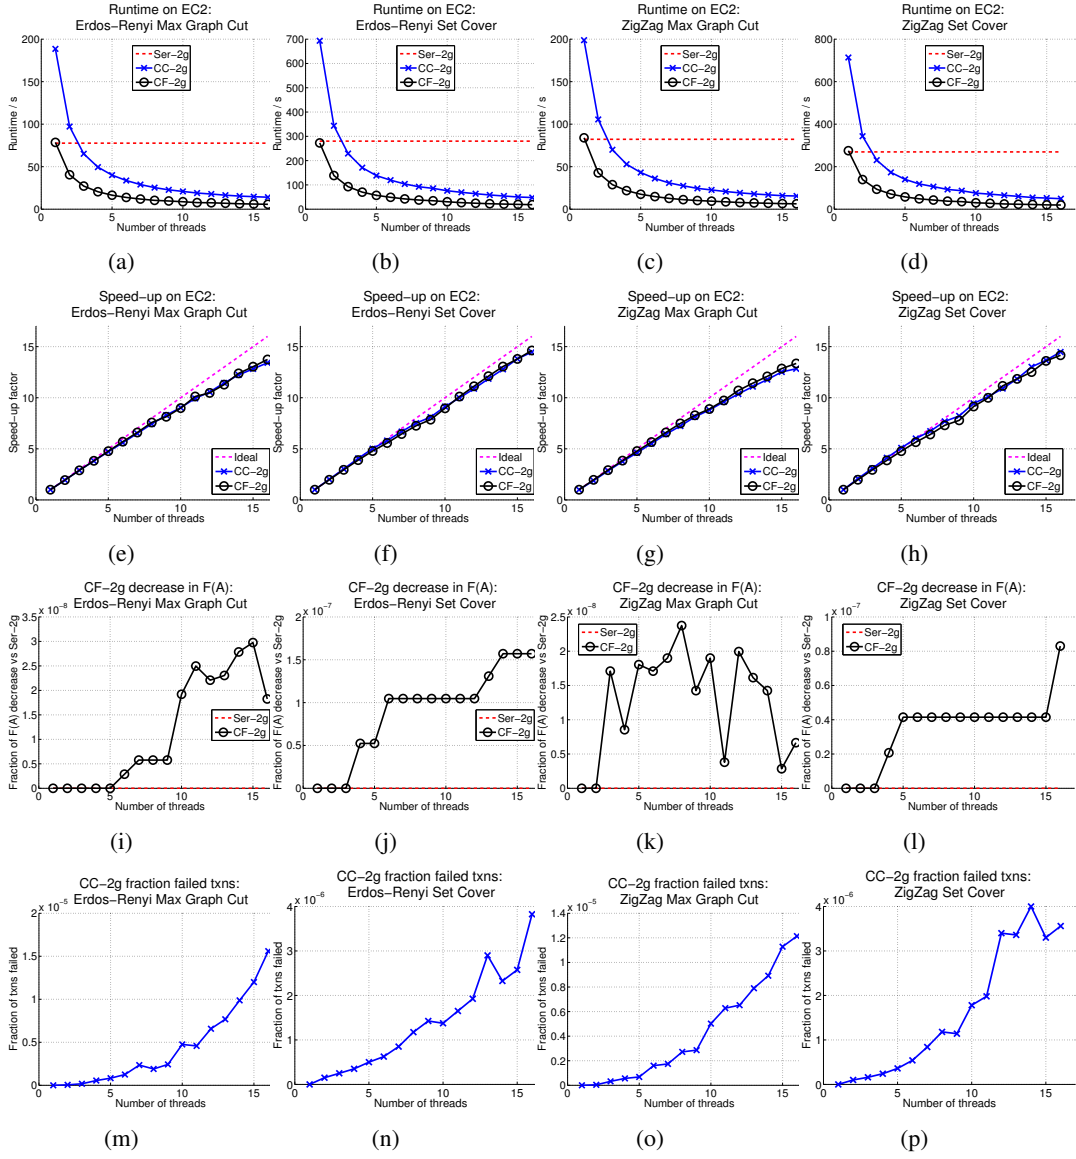

Figure 5: Experimental results on Erdos-Renyi and ZigZag synthetic graphs.

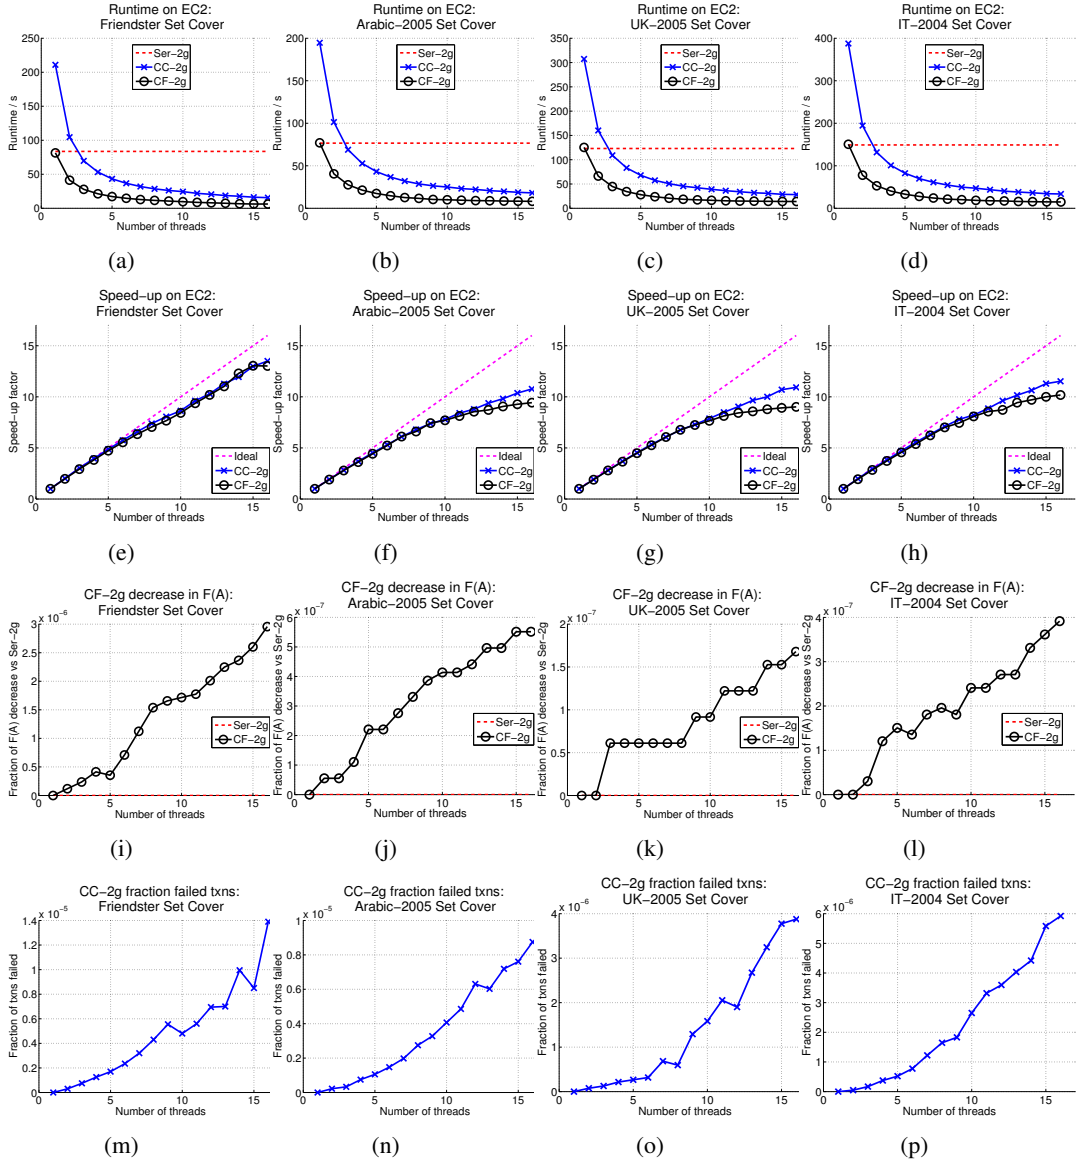

Figure 6: Set cover on 4 real graphs.

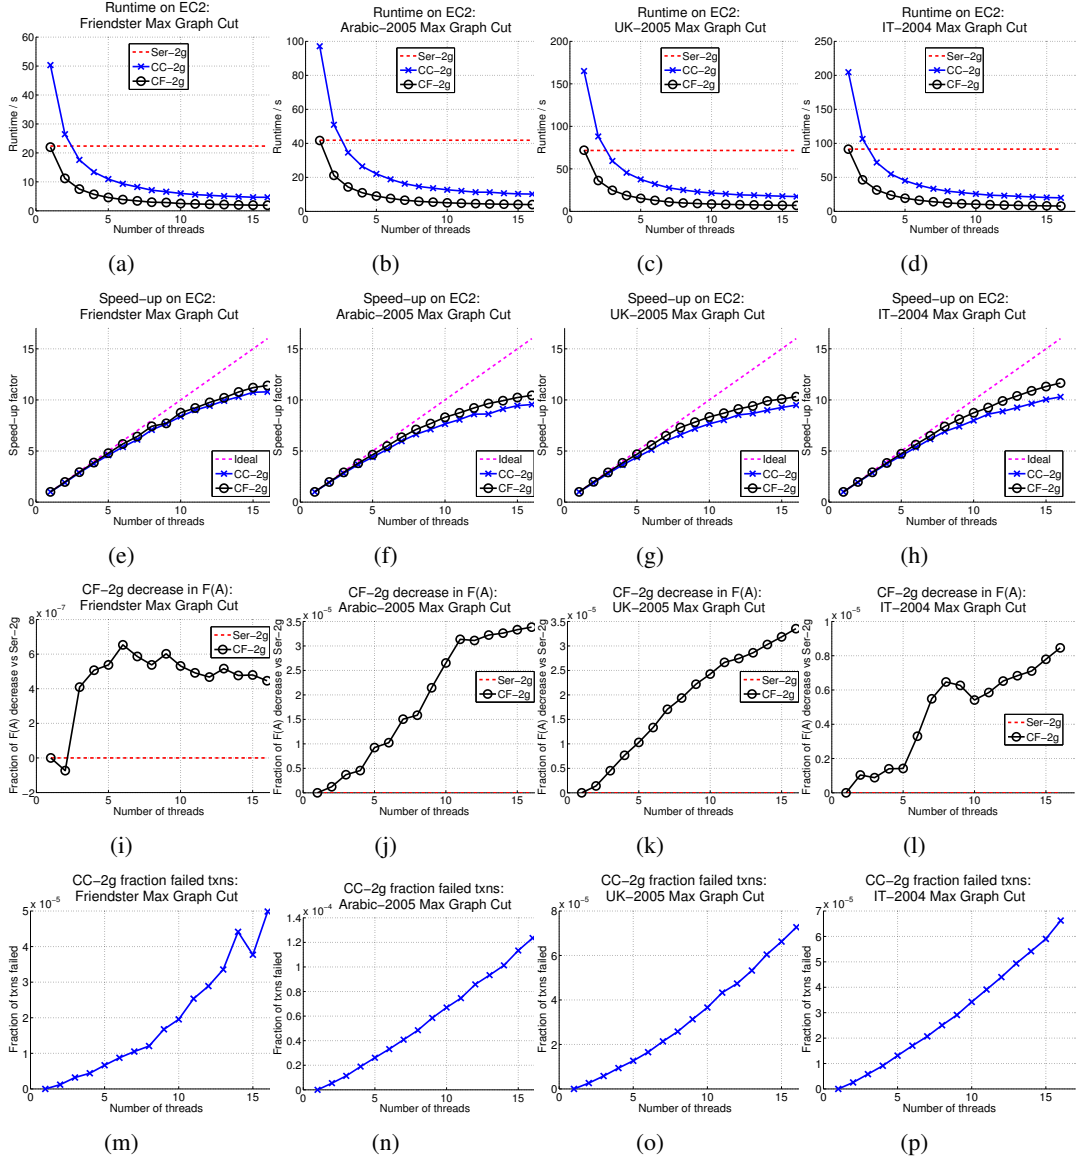

Figure 7: Max graph cut on 4 real graphs.

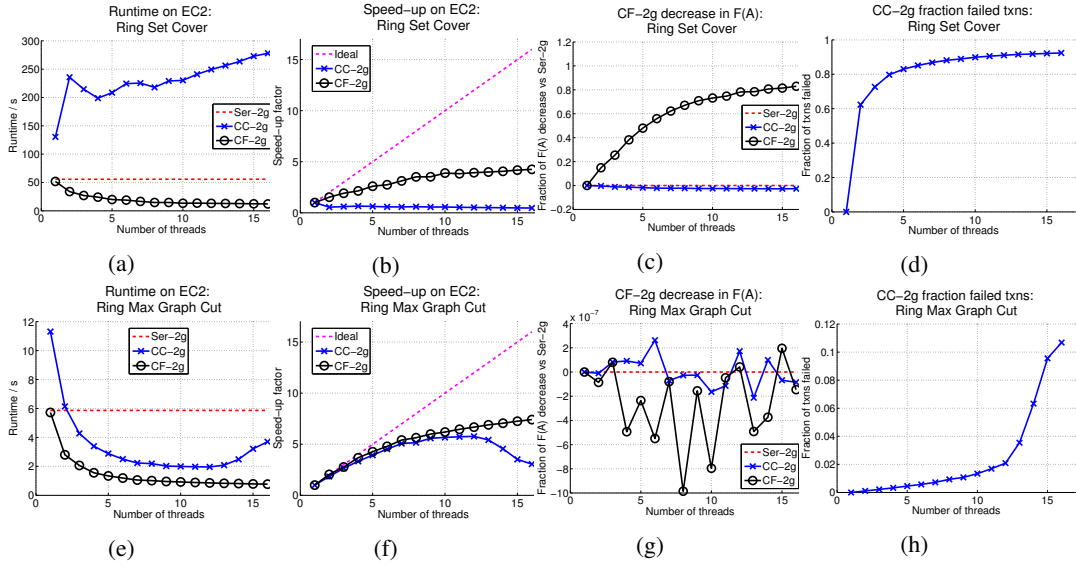

Figure 8: Experimental results for ring graph on set cover problem.



## H Illustrative examples

The following examples illustrate how (i) the simple (uni-directional) greedy algorithm may fail for non-monotone submodular functions, and (ii) where the coordination-free double greedy algorithm can run into trouble.

### H.1 Greedy and non-monotone functions

For illustration, consider the following toy example of a non-monotone submodular function. We are given a ground set  $V = \{v_0, v_1, v_2, \dots, v_k\}$  of  $k + 1$  elements, and a universe  $U = \{u_1, \dots, u_k\}$ . Each element  $v_i$  in  $V$  covers elements  $\text{Cov}(v_i) \subseteq U$  of the universe. In addition, each element in  $V$  has a cost  $c(v_i)$ . We are aiming to maximize the submodular function

$$F(S) = \left| \bigcup_{v \in S} \text{Cov}(v) \right| - \sum_{v \in S} c(v). \quad (3)$$

Let the costs and coverings be as follows:

$$\text{Cov}(v_0) = U \quad c(v_0) = k - 1 \quad (4)$$

$$\text{Cov}(v_i) = u_i \quad c(v_i) = \epsilon < 1/k^2 \quad \text{for all } i > 0. \quad (5)$$

Then the optimal solution is  $S^* = V \setminus v_0$  with  $F(S^*) = k - k\epsilon$ .

The greedy algorithm of Nemhauser et al. [8] always adds the element with the largest marginal gain. Since  $F(v_0) = 1$  and  $F(v_i) = 1 - \epsilon$  for all  $i > 0$ , the algorithm would pick  $v_0$  first. After that, any additional element only has a negative marginal gain,  $F(\{v_0, v_i\}) - F(v_0) = -\epsilon$ . Hence, the algorithm would end up with a solution  $F(v_0) = 1$  or worse, which means an approximation factor of only approximately  $1/k$ .

For the double greedy algorithm, the scenario would be the following. If  $v_0$  happens to be the first element, then it is picked with probability

$$P(v_0) = \frac{[F(v_0) - F(\emptyset)]_+}{[F(v_0) - F(\emptyset)]_+ + [F(V \setminus v_0) - F(V)]_-} = \frac{1}{1 + (k - 1)} = \frac{1}{k}. \quad (6)$$

If  $v_0$  is selected, nothing else will be added afterwards, since  $[F(v_0, v_i) - F(v_0)]_+ = 0$ . If it does not pick  $v_0$ , then any other element is added with a probability of

$$P(v_i \mid \neg v_0) = \frac{[F(v_i) - F(\emptyset)]_+}{[F(v_i) - F(\emptyset)]_+ + [F(V \setminus \{v_0, v_i\}) - F(V \setminus v_0)]_-} = \frac{1 - \epsilon}{1 - \epsilon} = 1. \quad (7)$$

If  $v_0$  is not the first element, then any element before  $v_0$  is added with probability  $p(v_i) = 1 - \epsilon$ , and as soon as an element  $v_i$  has been picked,  $v_0$  will not be added any more. Hence, with high probability, this algorithm returns the optimal solution. The deterministic version surely does.

### H.2 Coordination vs no coordination

The following example illustrates the differences between coordination and no coordination. In this example, let  $V$  be split into  $m$  disjoint groups  $G_j$  of equal size  $k = |V|/m$ , and let

$$F(S) = \sum_{j=1}^m \min\{1, |S \cap G_j|\} - \frac{|S \cap G_j|}{k}. \quad (8)$$

A maximizing set  $S^*$  contains one element from each group, and  $F(S^*) = m - m/k$ .

If the sequential double greedy algorithm has not picked an element from a group, it will retain the next element from that group with probability

$$\frac{1 - 1/k}{1 - 1/k + 1/k} = 1 - 1/k. \quad (9)$$

Once it has sampled an element from a group  $G_j$ , it does not pick any more elements from  $G_j$ , and therefore  $|S \cap G_j| \leq 1$  for all  $j$  and the set  $S$  returned by the algorithm. The probability that  $S$

does not contain any element from  $G_j$  is  $k^{-k}$ —fairly low. Hence, with probability  $1 - m/k^k$  the algorithm returns the optimal solution.

Without coordination, the outcome heavily depends on the order of the elements. For simplicity, assume that  $k$  is a multiple of the number  $q$  of processors (or  $q$  is a multiple of  $k$ ). In the worst case, the elements are sorted by their groups and the members of each group are processed in parallel. With  $q$  processors working in parallel, the first  $q$  elements from a group  $G$  (up to shifts) will be processed with a bound  $\hat{A}$  that does not contain any element from  $G$ , and will each be selected with probability  $1 - 1/k$ . Hence, in expectation,  $|S \cap G_j| = \min\{q, k\}(1 - 1/k)$  for all  $j$ .

If  $q > k$ , then in expectation  $k - 1$  elements from each group are selected, which corresponds to an approximation factor of

$$\frac{m(1 - \frac{k-1}{k})}{m(1 - 1/k)} = \frac{1}{k-1}. \quad (10)$$

If  $k > q$ , then in expectation we obtain an approximation factor of

$$\frac{m(1 - \frac{q(1-1/k)}{k})}{m(1 - 1/k)} = 1 - \frac{q}{k} + \frac{1}{k-1} \quad (11)$$

which decreases linearly in  $q$ . If  $q = k$ , then the factor is  $1/(q - 1)$  instead of  $1/2$ .
